# Supplementary material for: Coat-colour-related genotypes, phenotyping and biometric assessment of three ecotypes of pigs in Cameroon
Source: Copernicus journal article supplement (doi:10.5194/aab-68-239-2025), 2025-03-28
Supplement: Supplementary file 1 [file aab-68-239-2025-supplement.zip]

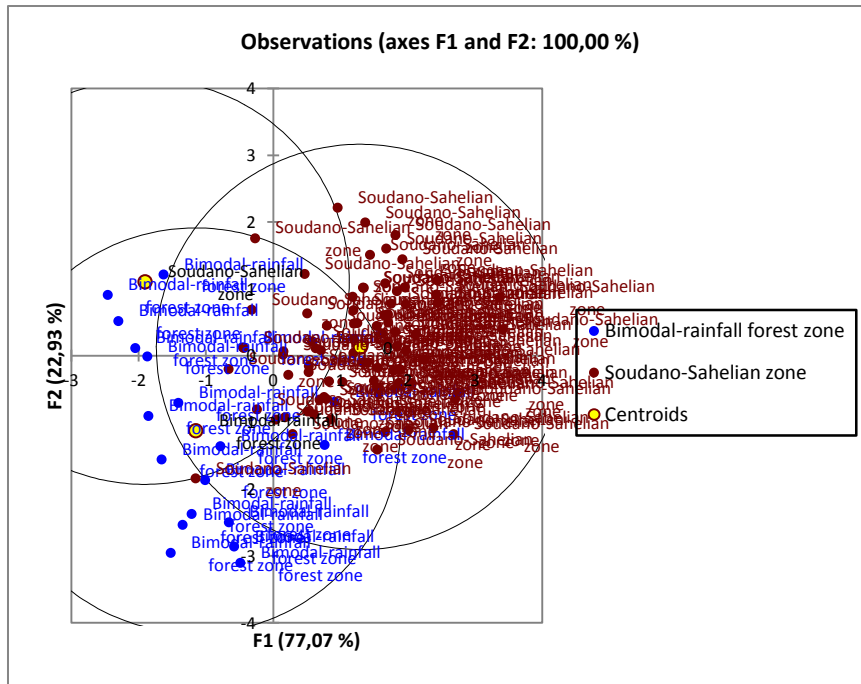

Figure S1: Discriminate analysis showing phenotypic admixture among the pigs from the three agroecological zones on F1 and F2 axes
