# Supplementary material for: Coat-colour-related genotypes, phenotyping and biometric assessment of three ecotypes of pigs in Cameroon
Source: Copernicus journal article supplement (doi:10.5194/aab-68-239-2025), 2025-03-28
Supplement: Supplementary file 2 [file aab-68-239-2025-supplement.zip]

Table S1: Contribution of the variables (%)

|                        | F1            | F2      | F3      | F4      | F5      | F6      | F7      | F8      | F9      | F10     | F11     | F12     | F13     | F14     | F15     | F16     | F17     | F18     | F19     |
|------------------------|---------------|---------|---------|---------|---------|---------|---------|---------|---------|---------|---------|---------|---------|---------|---------|---------|---------|---------|---------|
| Head length            | 5.0348        | 6.4482  | 0.7610  | 2.8108  | 10.8412 | 1.6472  | 11.4452 | 6.7974  | 0.4812  | 3.2996  | 27.3663 | 1.0865  | 11.0810 | 6.8377  | 0.0243  | 0.6191  | 2.9985  | 0.2066  | 0.2137  |
| Ear Length             | 4.8126        | 0.2184  | 0.0402  | 9.5813  | 0.0003  | 38.4024 | 2.1233  | 8.0307  | 16.8648 | 9.7957  | 0.7981  | 0.0910  | 0.8035  | 7.5487  | 0.0005  | 0.6375  | 0.0539  | 0.0492  | 0.1479  |
| Muzzle Length          | 4.9223        | 3.0216  | 1.5743  | 2.7679  | 20.3532 | 0.2115  | 0.8827  | 13.4269 | 4.8953  | 8.2421  | 27.5266 | 0.3896  | 9.7544  | 1.1896  | 0.1193  | 0.0605  | 0.4989  | 0.0165  | 0.1468  |
| Muzzle circumference   | 4.8714        | 3.9749  | 0.6631  | 1.5901  | 1.6231  | 27.8858 | 12.1079 | 17.3314 | 0.7694  | 15.1342 | 1.4742  | 0.4130  | 11.0071 | 0.0000  | 0.0272  | 0.0959  | 0.9575  | 0.0531  | 0.0206  |
| Body Length            | <b>7.3761</b> | 0.1365  | 0.9840  | 0.0012  | 0.7696  | 0.0529  | 0.0383  | 0.0466  | 0.8352  | 4.8099  | 0.7772  | 9.3759  | 5.7100  | 5.0638  | 0.0321  | 0.1610  | 5.7450  | 58.0800 | 0.0048  |
| Scapulo-Ischial Length | 6.9960        | 0.0158  | 0.2281  | 0.0115  | 1.1058  | 1.5730  | 0.0968  | 0.7078  | 4.0644  | 6.4074  | 0.1634  | 14.2734 | 10.4802 | 14.6041 | 3.0603  | 5.8798  | 7.2282  | 23.0698 | 0.0342  |
| Chest circumference    | <b>7.1487</b> | 0.0426  | 1.1921  | 5.3911  | 1.9401  | 0.0049  | 0.8239  | 0.2971  | 0.8212  | 3.0533  | 1.3387  | 23.1474 | 0.5030  | 1.5673  | 1.8266  | 0.0163  | 0.7330  | 0.1084  | 50.0444 |
| Hip width              | 3.7435        | 0.7861  | 0.1429  | 39.5645 | 0.0120  | 2.8763  | 14.0006 | 11.2287 | 2.1849  | 14.5030 | 2.4454  | 1.3829  | 2.2807  | 4.6330  | 0.0437  | 0.0003  | 0.1702  | 0.0011  | 0.0003  |
| Withers Height         | <b>7.2787</b> | 0.8962  | 0.0070  | 0.6349  | 0.0540  | 0.4708  | 0.0255  | 0.0115  | 0.7203  | 1.8553  | 1.1953  | 0.1889  | 0.0372  | 1.8295  | 16.1304 | 63.9225 | 2.6476  | 2.0650  | 0.0294  |
| Ischium Width          | 0.8425        | 0.3386  | 84.7495 | 0.2195  | 0.3388  | 0.1306  | 2.9060  | 0.1762  | 5.3642  | 1.7660  | 0.0740  | 1.5156  | 0.0147  | 0.1604  | 0.0051  | 0.9533  | 0.0251  | 0.4026  | 0.0173  |
| Chest Depth            | 6.8349        | 0.0255  | 0.1630  | 2.7688  | 0.6412  | 2.0808  | 0.1821  | 1.4512  | 0.3437  | 7.2029  | 1.4473  | 3.9416  | 2.8289  | 11.2117 | 39.1445 | 9.8964  | 6.1027  | 3.6866  | 0.0460  |
| Front Leg length       | 6.3133        | 0.1483  | 0.6780  | 7.0067  | 3.5838  | 0.0441  | 2.6810  | 0.0528  | 0.2445  | 0.2204  | 7.0419  | 11.4996 | 9.8299  | 33.9752 | 1.3520  | 7.3379  | 7.8303  | 0.1323  | 0.0280  |
| Hindleg length         | 4.1722        | 0.3527  | 3.2094  | 4.7401  | 35.5657 | 0.7838  | 36.4225 | 0.1314  | 0.0004  | 0.4010  | 10.1580 | 0.7876  | 0.2019  | 0.9430  | 0.0980  | 0.6574  | 1.3727  | 0.0000  | 0.0023  |
| Tail Length            | 5.9701        | 0.3388  | 0.3365  | 7.9057  | 0.9408  | 0.0482  | 0.0262  | 7.5066  | 15.2295 | 9.3556  | 10.9624 | 2.4508  | 11.5754 | 3.9550  | 7.4791  | 0.1245  | 14.2501 | 1.5449  | 0.0001  |
| Cannon circumference   | <b>7.1116</b> | 1.0864  | 0.3900  | 0.9923  | 3.3915  | 0.3429  | 0.9519  | 0.7838  | 0.0990  | 0.2122  | 0.0725  | 3.7935  | 2.0084  | 2.7768  | 24.6228 | 8.5826  | 36.3233 | 6.4560  | 0.0024  |
| Ham circumference      | 5.3000        | 2.5349  | 0.0335  | 5.6288  | 7.7938  | 3.6487  | 5.8966  | 23.5166 | 9.6051  | 5.0720  | 4.1897  | 2.6126  | 5.7315  | 2.3442  | 0.1196  | 0.5828  | 11.9526 | 3.4368  | 0.0003  |
| Longueur des poils     | 0.1737        | 62.2388 | 0.0928  | 2.4446  | 6.6587  | 7.4898  | 6.4698  | 3.8243  | 5.6909  | 2.7915  | 0.0411  | 0.1661  | 0.2798  | 0.5440  | 0.2194  | 0.2547  | 0.0599  | 0.5530  | 0.0070  |
| Hair Length            | 3.9983        | 17.2444 | 3.6375  | 0.0064  | 2.6526  | 12.2984 | 1.2660  | 4.6183  | 31.7118 | 2.9706  | 0.0383  | 0.4585  | 15.4066 | 0.4522  | 2.9860  | 0.1707  | 0.0022  | 0.0046  | 0.0769  |
| Body weigth            | <b>7.0994</b> | 0.1512  | 1.1173  | 5.9339  | 1.7340  | 0.0080  | 1.6538  | 0.0608  | 0.0743  | 2.9072  | 2.8896  | 22.4255 | 0.4659  | 0.3638  | 2.7092  | 0.0469  | 1.0484  | 0.1334  | 49.1775 |
