# Supplementary material for: Coat-colour-related genotypes, phenotyping and biometric assessment of three ecotypes of pigs in Cameroon
Source: Copernicus journal article supplement (doi:10.5194/aab-68-239-2025), 2025-03-28
Supplement: Supplementary file 3 [file aab-68-239-2025-supplement.zip]

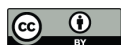

*Supplement of*

## **Coat-colour-related genotypes, phenotyping and biometric assessment of three ecotypes of pigs in Cameroon**

**Aveniolo Idelo Nono Ekane et al.**

*Correspondence to:* Blaise Arnaud Hako Touko ([hakoarnaud@gmail.com](mailto:hakoarnaud@gmail.com))

- [aab-68-239-2025-supplement-title-page.pdf](#)
- [Figure S1.pdf](#)
- [Table S1.pdf](#)

The copyright of individual parts of the supplement might differ from the article licence.
